# Supplementary material for: Translational dependence of the geometry of metallic mono- and bilayers optimized on semi-ionic supports: the cases of Pd on γ-Al2O3(110), monoclinic ZrO2(001), and rutile TiO2(001)
Source: Royal Society of Chemistry journal article supplement (doi:10.1039/d1ce01365c), 2021-11-16

*Electronic Supplementary Information for original paper submitted for  
publication in CrystEngComm*

**Translational dependence of the geometry of metallic mono- and bilayers optimized at  
semi-ionic supports. The cases of Pd at  $\gamma$ -Al<sub>2</sub>O<sub>3</sub>(110), monoclinic ZrO<sub>2</sub>(001), and rutile  
TiO<sub>2</sub>(001).**

A.A. Rybakov<sup>a</sup>, V.A. Larin<sup>b</sup>, D.N. Trubnikov<sup>a</sup>, S. Todorova<sup>c</sup>, A.V. Larin<sup>a\*</sup>

<sup>a</sup>*Department of Chemistry, Moscow State University, GSP-2, Leninskie Gory, Moscow 119992,  
Russia 119992*

<sup>b</sup>*Technology Center Lantan, LTD, Rubtsovskaya naber., 2, korp.4, Moscow, 105082, Russia*

<sup>c</sup>*Institute of Catalysis, Bulgarian Academy of Sciences, Acad. G. Bonchev St., Bldg 11, 1113  
Sofia, Bulgaria*

*TOTAL PAGES 8*

*TABLES 2*

*FIGURES 3*

Table S1. Pd-O distances and final  $U_{\text{Pd}}$  values in the bilayer  $\text{Pd}_{32}(111)$  slabs at the  $m\text{-ZrO}_2(001)$  (Fig. S2).

| $U_{\text{Pd}} = -4.836$ | $U_{\text{Pd}} = -4.920$ |
|--------------------------|--------------------------|
| 2.125                    | 2.174                    |
| 2.126                    | 2.164                    |
| 2.208                    | 2.137                    |
| 2.207                    | 2.138                    |
| 2.125                    | 2.159                    |
| 2.125                    | 2.150                    |
| 2.208                    | 2.156                    |
| 2.208                    | 2.164                    |

Table S2. Relative stabilization energy (eV/Pd) per Pd atom  $U_{Pd}$  (1) for single atom, clusters (N = 24), (111) monolayers with vacancies (N = 24-28), full monolayers (N = 28, 30), bilayer (N = 36), and 4-layer Pd(110) (N = 72) deposited over  $Al_{16}O_{20}$  model of  $\gamma-Al_2O_3(110)$  (-959.173/-972.443 eV),  $Ti_{36}O_{72}$  model of  $TiO_2(001)$  surface (-931.47/-943.070 eV) and  $Zr_{32}O_{64}$  model of  $m-ZrO_2(001)$  surface (-902.078/-914.999 eV) optimized at PBE/PBE-D3 levels.

| System           | N                | -U                        |          | - $U_{Pd}$ |        | Figure |
|------------------|------------------|---------------------------|----------|------------|--------|--------|
|                  |                  | PBE                       | PBE-D3   | PBE        | PBE-D3 |        |
| $\gamma-Al_2O_3$ |                  |                           |          |            |        |        |
| Atom             | 1                | 964.487                   | 978.080  | 5.314      | 5.637  | S1g    |
|                  |                  | 962.960                   | 976.625  | 3.787      | 4.182  | -      |
|                  |                  | 962.928                   | 976.592  | 3.755      | 4.149  | -      |
|                  |                  | 245.044 <sup>a)</sup>     | 248.728  | 5.159      | 5.538  | 1b     |
| 1-layer          | 24               | 1075.617                  | 1099.454 | 4.852      | 5.293  | 2a, b  |
|                  |                  | 1076.438 <sup>b)</sup>    | 1101.163 | 4.886      | 5.364  | 2c, d  |
|                  |                  | 1073.141 <sup>c)</sup>    | 1097.848 | 4.749      | 5.226  | 2e, f  |
|                  |                  | 1076.671 <sup>d)</sup>    | 1101.153 | 4.896      | 5.363  | 2g, h  |
|                  | 28               | 1094.895                  | 1120.937 | 4.847      | 5.303  | S4c    |
|                  |                  | 1095.404 <sup>e)</sup>    | 1121.211 | 4.865      | 5.313  | -      |
|                  |                  | 1095.295 <sup>f)</sup>    | 1121.491 | 4.862      | 5.323  | 3h     |
| 30               | 1105.119         | 1132.106                  | 4.865    | 5.322      | 3i     |        |
| 2-layer(100)     | 48               | 1196.118 <sup>g)</sup>    | 1231.586 | 4.936      | 5.399  | 1c     |
|                  |                  | 1196.352 <sup>e, g)</sup> | 1231.607 | 4.941      | 5.399  | -      |
| $TiO_2$          |                  |                           |          |            |        |        |
| Atom             | 1                | 934.788                   | 946.878  | 3.318      | 3.81   | S1a    |
|                  |                  | 934.581                   | 946.683  | 3.111      | 3.69   | S1b    |
|                  |                  | 934.196                   | 946.370  | 2.726      | 3.39   | S1c    |
| Cluster          | 24               | 1034.136                  | 1056.228 | 4.278      | 4.715  | 1e     |
| 1-layer (111)    | 24               | 1029.716                  | 1053.657 | 4.094      | 4.608  | S1d    |
|                  | 24 <sup>f)</sup> | 1029.174                  | 1052.945 | 4.071      | 4.578  | S1e    |
|                  | 24 <sup>h)</sup> | 1032.018                  | 1055.457 | 4.190      | 4.683  | 4f     |
|                  | 27               | 1046.584                  | 1071.924 | 4.263      | 4.295  | 4d, e  |
|                  | 28               | 1051.996                  | -        | 4.305      | -      | 6a     |
|                  | 30               | 1072.773                  | 1099.998 | 4.710      | 5.23   | 4g,h   |
|                  | 30 <sup>f)</sup> | 1062.322                  | 1089.401 | 4.362      | 4.878  | 4i, j  |
| 32               | 1070.756         | -                         | 4.353    | -          | S3b    |        |
| 2-layer(111)     | 48               | 1153.110                  | 1187.298 | 4.618      | 5.088  | S1f    |
| 4-layer (110)    | 72               | 1270.856                  | 1316.895 | 4.714      | 5.192  | 1f     |
| $m-ZrO_2$        |                  |                           |          |            |        |        |
| Atom             | 1                | 906.345                   | -        | 4.267      | -      | S1h    |
| 1-layer          | 16               | 970.783 <sup>i)</sup>     | 991.707  | 4.294      | 4.794  | 5a     |
|                  |                  | 969.970 <sup>j)</sup>     | 991.059  | 4.243      | 4.754  | -      |
|                  |                  | 971.278 <sup>g)</sup>     | 992.182  | 4.325      | 4.824  | -      |
|                  |                  | 971.459 <sup>k)</sup>     | 992.492  | 4.336      | 4.843  | 5b, c  |
|                  |                  | 971.455 <sup>l)</sup>     | 992.485  | 4.336      | 4.843  | 5d     |
| 2-layer (111)    | 32 <sup>m)</sup> | 597.438 <sup>g)</sup>     | 617.927  | 4.920      | 5.417  | S2b    |
|                  |                  | 594.750 <sup>g)</sup>     | 614.605  | 4.836      | 5.313  | S2a    |

<sup>a)</sup> for smaller UC such as  $Al_{14}O_{20}$  (-239.885/-243.190 eV, see text); <sup>b)</sup> after shift by 1 Å along OY direction; <sup>c)</sup> after shift by 2 Å along OY direction; <sup>d)</sup> after shift by 3 Å along OY direction; <sup>e)</sup> shift by 1 Å along both OX and OY directions; <sup>f)</sup> shift by 1 Å along OX direction; <sup>g)</sup> (111) model; <sup>h)</sup>

“band” type structure; <sup>i)</sup> 1/1 model; <sup>j)</sup> (100) model; <sup>k)</sup> 4R-4R model; <sup>l)</sup> “mix” model; <sup>m)</sup> thin  $\text{Zr}_{16}\text{O}_{32}$  support model (-440.002/-444.576 eV).

## Figure captions

Figure S1. (a-c, g, h) Single Pd atoms, (d-e) Pd<sub>24</sub> monolayers, (f) Pd<sub>48</sub> bilayer at (a-f) Ti<sub>36</sub>O<sub>72</sub> model of rutile TiO<sub>2</sub>(001), (g) Al<sub>56</sub>O<sub>80</sub> model of  $\gamma$ -Al<sub>2</sub>O<sub>3</sub>(110), (h) Zr<sub>32</sub>O<sub>64</sub> model of m-ZrO<sub>2</sub>(001) surfaces optimized at the PBE level. The stabilization energy per Pd atom U<sub>Pd</sub> is given in eV/Pd. The atomic colors are given in red, magenta, green, cyan light, and gray for O, Al, Ti, Zr, and Pd, respectively.

Figure S2. Upper projection of Pd<sub>32</sub>(111) bilayers at Zr<sub>32</sub>O<sub>64</sub> model of m-ZrO<sub>2</sub>(001) surfaces optimized at the PBE level. The stabilization energy U<sub>Pd</sub> per Pd atom is given in eV/Pd. The atomic color agreement corresponds to Fig. S1.

Figure S3. (a, b) Side and (c) upper projection of (a) as deposited (non-optimized) Pd<sub>32</sub>(100), optimized (b) Pd<sub>32</sub> and (c) Pd<sub>28</sub>(111) monolayers at Ti<sub>36</sub>O<sub>72</sub> model of m-TiO<sub>2</sub>(001) surfaces optimized at the PBE level. The stabilization energy U<sub>Pd</sub> per Pd atom is given in eV/Pd. Divacancy is shown by ellipse (c). The atomic color agreement corresponds to Fig. S1.

Figure S1

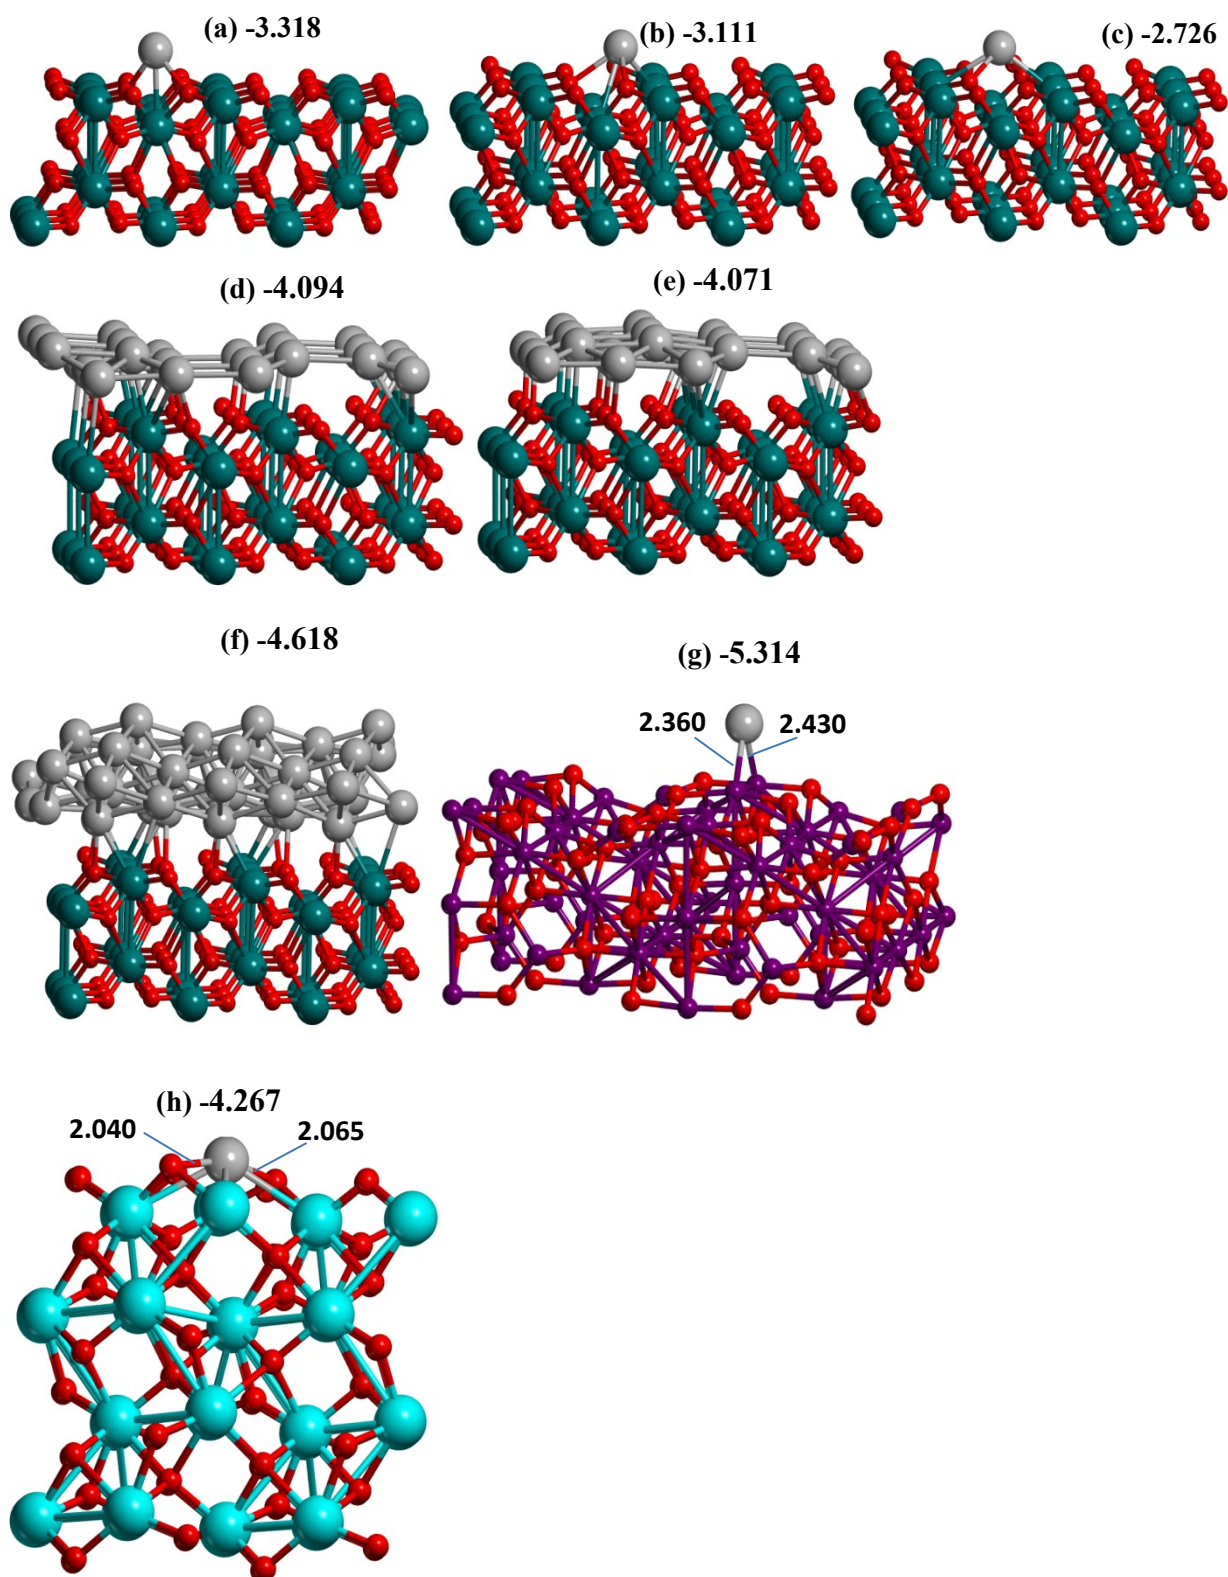

**Figure S2**

**(a) -4.836**

**(b) -4.920**

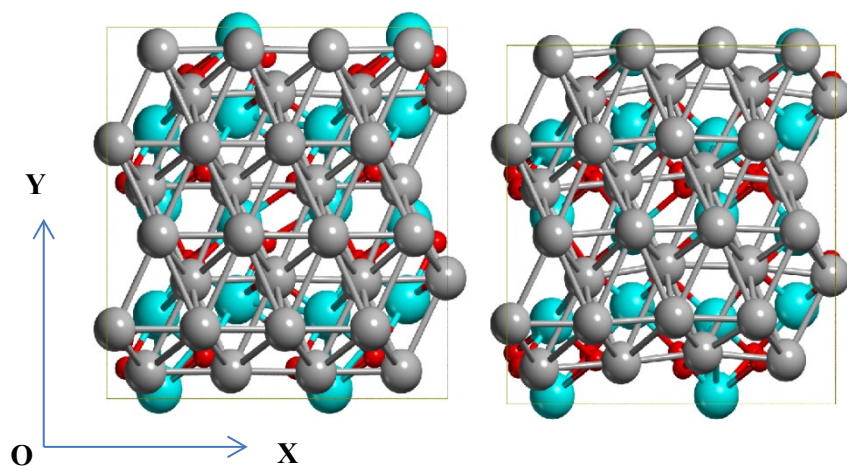

Figure S3

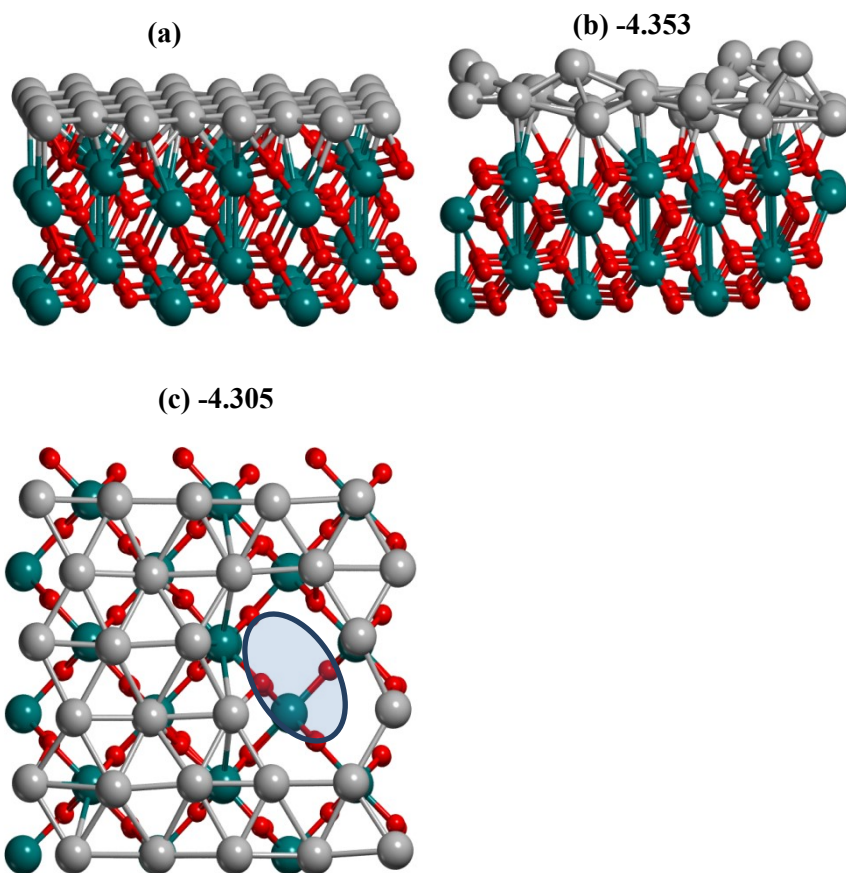

Supplement: d1ce01365c2.pdf [file d1ce01365c2.pdf]
